# Supplementary material
Source: PubMed Central journal article supplement (PMC3966947)

**SUPPLEMENT MATERIAL: TABLES AND FIGURES**

**Tissue-specific RNA-Seq in Human Evoked Inflammation Identifies Blood and Adipose  
LincRNA Signatures of Cardio-metabolic Diseases**

**Running title:** LincRNA signatures in evoked inflammation

\*Yichuan Liu, \*Jane F. Ferguson, Chenyi Xue, Rachel L. Ballantyne, Ian M. Silverman, Sager J. Gosai, Jacquelyn Serfecz, Michael P. Morley, Brian D. Gregory, \*Mingyao Li,  
\*Muredach P. Reilly

Department of Biostatistics and Epidemiology, Cardiovascular Institute, Department of Biology,  
Perelman School of Medicine and School of Arts and Science at the University of Pennsylvania,  
Philadelphia, PA 19104

\* These authors contributed equally

**Supplementary Table I. Clinical characteristics of additional RNA-Seq subjects (N=7) as well as subject A (A) at baseline and (B) during endotoxemia**

| (A)                             |  | Subject A | Additional RNA-Seq<br>Subjects (N=7)<br>Mean (SD) |
|---------------------------------|--|-----------|---------------------------------------------------|
| Age (Years)                     |  | 34        | 24.9 (4.9)                                        |
| Total Cholesterol (mg/dL)       |  | 147       | 161 (29)                                          |
| HDL-Cholesterol (mg/dL)         |  | 66        | 59 (13)                                           |
| Triglycerides (mg/dL)           |  | 63        | 65 (19)                                           |
| LDL-Cholesterol (mg/dL)         |  | 68        | 89 (24)                                           |
| Systolic Blood Pressure (mmHg)  |  | 112       | 106 (12)                                          |
| Diastolic Blood Pressure (mmHg) |  | 66        | 60 (6.6)                                          |
| Glucose (mg/dL)                 |  | 79        | 88 (9)                                            |

  

| (B)                  |                    | Subject A              | Additional RNA-Seq<br>Subjects (N=7)<br>Mean (SD) |
|----------------------|--------------------|------------------------|---------------------------------------------------|
| IL-6 (pg/ml)         | Baseline           | 3.9                    | 3.1 (1.9)                                         |
|                      | Peak (2hour)       | 294                    | 270 (314)                                         |
|                      | Fold Change        | 76                     | 87                                                |
|                      | Percentile of peak | <b>84<sup>th</sup></b> |                                                   |
| TNF $\alpha$ (pg/ml) | Baseline           | 0.8                    | 1.5 (0.9)                                         |
|                      | Peak (2 hour)      | 50                     | 43 (36)                                           |
|                      | Fold Change        | 65                     | 29                                                |
|                      | Percentile of peak | <b>64<sup>th</sup></b> |                                                   |
| CRP (mg/L)           | Baseline           | 0.8                    | 0.9 (0.5)                                         |
|                      | Peak (24 hour)     | 20                     | 14 (6.1)                                          |
|                      | Percentile of peak | <b>67<sup>th</sup></b> |                                                   |
| SAA (mg/L)           | Baseline           | 2.6                    | 5.4 (2.0)                                         |
|                      | Peak (24 hour)     | 81                     | 79 (34)                                           |
|                      | Percentile of peak | <b>52<sup>nd</sup></b> |                                                   |
| Temp. (°F)           | Baseline           | 98.6                   | 98.0 (0.4)                                        |
|                      | Peak               | 100.2                  | 98.8 (0.6)                                        |
|                      | Percentile of peak | <b>87<sup>th</sup></b> |                                                   |

GENE=Genetics of Evoked-responses to Niacin and Endotoxemia; HDL=high-density lipoprotein; LDL=low density lipoprotein; IL=interleukin; TNF=tumor necrosis factor; CRP=C reactive protein; SAA=serum amyloid A. Temp=temperature.

**Supplementary Table II A. Mapping statistics for blood, adipose and peripheral blood mononuclear cell (PBMC) RNA-seq**

**data of Subject A.** Data were aligned to the hg19 reference genome using Tophat. Several filtering steps were applied: 1) the mapping quality score of each read is  $\geq 30$ , 2) reads from the same pair are mapped to the same chromosome with expected orientations and the mapping distance between the read pair is  $< 500,000$  bp, and 3) each read is uniquely mapped to the genome.

| Dataset | Tissue  | Time       | # reads       | # reads mapped (%)    | # reads after filtering and removal of MT reads (%) | # reads after removal of hemoglobin reads (%) |
|---------|---------|------------|---------------|-----------------------|-----------------------------------------------------|-----------------------------------------------|
| "500M"  | Blood   | Before LPS | 975,716,014   | 923,005,020 (94.6%)   | 585,846,896 (60.0%)                                 | 291,687,188 (29.9%)                           |
|         |         | After LPS  | 1,401,930,558 | 1,379,325,458 (98.4%) | 880,867,214 (62.8%)                                 | 392,057,816 (28.0%)                           |
|         | Adipose | Before LPS | 911,584,508   | 771,290,702 (84.6%)   | 481,769,060 (52.8%)                                 | NA                                            |
|         |         | After LPS  | 1,039,937,222 | 856,379,122 (82.3%)   | 505,363,138 (48.6%)                                 | NA                                            |
| "50M"   | Blood   | Before LPS | 116,058,338   | 108,022,800 (93.1%)   | 66,797,258 (57.6%)                                  | 35,288,901 (30.4%)                            |
|         |         | After LPS  | 137,886,080   | 134,590,748 (97.6%)   | 85,165,976 (61.8%)                                  | 38,388,626 (27.8%)                            |
|         | Adipose | Before LPS | 66,603,980    | 57,113,510 (85.8%)    | 36,253,892 (54.4%)                                  | NA                                            |
|         |         | After LPS  | 64,824,708    | 53,726,630 (82.9%)    | 32,587,354 (50.3%)                                  | NA                                            |
| "100M"  | PBMCs   | Before LPS | 101,500,948   | 99,190,666 (97.7%)    | 90,639,392 (89.3%)                                  | NA                                            |
|         |         | After LPS  | 128,544,798   | 115,915,271 (90.2%)   | 105,509,034 (82.1%)                                 | NA                                            |

**Supplementary Table II B. Mapping statistics for blood RNA-seq data of seven additional GENE study subjects.** Data were aligned to the hg19 reference genome using GSNAP. Several filtering steps were applied: 1) the mapping quality score of each read is  $\geq 30$ , 2) reads from the same pair are mapped to the same chromosome with expected orientations and the mapping distance between the read pair is  $< 500,000$  bp, and 3) each read mapped to less than 10 places in the genome.

| Subject | Tissue | Time     | # reads     | # reads mapped (%)  | # reads after filtering and removal of MT reads (%) | # reads after removal of hemoglobin reads (%) |
|---------|--------|----------|-------------|---------------------|-----------------------------------------------------|-----------------------------------------------|
| 1       | Blood  | Pre-LPS  | 176,120,502 | 166,648,428 (94.6%) | 130,887,262 (74.3%)                                 | 94,751,655 (53.8%)                            |
|         |        | Post-LPS | 189,518,510 | 182,407,306 (96.2%) | 141,400,070 (74.6%)                                 | 106,107,392 (56.0%)                           |
| 2       | Blood  | Pre-LPS  | 158,031,602 | 150,871,260 (95.5%) | 100,242,102 (63.4%)                                 | 58,898,371 (37.3%)                            |
|         |        | Post-LPS | 164,482,152 | 158,489,144 (96.4%) | 102,181,126 (62.1%)                                 | 56,525,292 (34.4%)                            |
| 3       | Blood  | Pre-LPS  | 153,597,648 | 148,791,570 (96.9%) | 105,166,412 (68.5%)                                 | 75,780,112 (49.3%)                            |
|         |        | Post-LPS | 192,453,406 | 186,797,464 (97.1%) | 128,601,256 (66.8%)                                 | 84,673,129 (44.0%)                            |
| 4       | Blood  | Pre-LPS  | 151,948,182 | 146,913,170 (96.7%) | 95,166,104 (62.6%)                                  | 37,779,321 (24.9%)                            |
|         |        | Post-LPS | 165,268,858 | 159,924,606 (96.8%) | 126,075,138 (76.3%)                                 | 75,380,501 (45.6%)                            |
| 5       | Blood  | Pre-LPS  | 162,010,742 | 157,034,248 (96.9%) | 102,286,622 (63.1%)                                 | 47,226,530 (29.2%)                            |
|         |        | Post-LPS | 153,595,830 | 149,102,820 (97.1%) | 79,820,178 (52.0%)                                  | 25,004,218 (16.3%)                            |
| 6       | Blood  | Pre-LPS  | 156,102,402 | 155,100,101 (99.4%) | 113,571,464 (72.8%)                                 | 73,517,123 (47.1%)                            |
|         |        | Post-LPS | 230,214,416 | 227,611,861 (98.9%) | 164,107,124 (71.3%)                                 | 101,419,425 (44.1%)                           |
| 7       | Blood  | Pre-LPS  | 194,244,710 | 192,452,582 (99.1%) | 110,906,433 (57.1%)                                 | 36,321,060 (18.7%)                            |
|         |        | Post-LPS | 181,039,184 | 178,692,110 (98.7%) | 109,483,021 (60.5%)                                 | 25,438,311 (14.1%)                            |

**Supplementary Table III A: LPS-modulated lincRNAs in blood of subject A deeply sequenced data. Highlighted are those that were selected for validation.**

| lincRNA             | locus                       | FPKM (pre-LPS) | FPKM (post-LPS) | p value         | q value         |
|---------------------|-----------------------------|----------------|-----------------|-----------------|-----------------|
| linc-C2orf54-1      | 2:241894035-241906868       | 6.95           | 0.06            | 0.00E+00        | 0.00E+00        |
| linc-CSTB-3         | 21:45224584-45232448        | 8.77           | 0.29            | 0.00E+00        | 0.00E+00        |
| <b>linc-CMC1-2</b>  | <b>3:27753780-27755870</b>  | <b>8.21</b>    | <b>0.77</b>     | <b>5.71E-14</b> | <b>2.18E-11</b> |
| linc-TMEM105-2      | 17:79361984-79367287        | 2.31           | 0.14            | 1.74E-10        | 2.58E-08        |
| linc-PPP2R2C-2      | 4:6689174-6692251           | 4.55           | 0.44            | 5.04E-09        | 4.97E-07        |
| linc-C17orf87       | 17:5142427-5145921          | 5.15           | 0.93            | 5.75E-09        | 5.60E-07        |
| linc-PRDM9-7        | 5:17444118-17485937         | 0.31           | 4.39            | 1.38E-08        | 1.18E-06        |
| linc-TACC3          | 4:1546984-1555291           | 1.33           | 0.29            | 1.47E-08        | 1.24E-06        |
| linc-AP2B1-2        | 17:33640517-33652444        | 7.93           | 2.13            | 7.97E-08        | 5.56E-06        |
| linc-BRAP-2         | 12:112277506-112331228      | 14.91          | 4.31            | 1.43E-07        | 9.19E-06        |
| linc-CTSD-2         | 11:1792622-1793111          | 2.14           | 27.37           | 1.50E-07        | 9.60E-06        |
| linc-LY6H           | 8:144362332-144363898       | 15.22          | 3.49            | 2.74E-07        | 1.57E-05        |
| linc-LFNG           | 7:2477397-2488305           | 4.88           | 1.59            | 6.41E-07        | 3.08E-05        |
| linc-EFR3B          | 2:25194980-25262563         | 3.71           | 0.27            | 9.35E-07        | 4.26E-05        |
| linc-ARFGEF2-4      | 20:46983956-47000425        | 2.82           | 0.87            | 1.00E-06        | 4.52E-05        |
| <b>linc-TP53I13</b> | <b>17:27894166-27895678</b> | <b>28.28</b>   | <b>8.36</b>     | <b>1.73E-06</b> | <b>7.08E-05</b> |
| linc-HES5-2         | 1:2481358-2486841           | 4.37           | 0.93            | 2.21E-06        | 8.73E-05        |
| linc-BCL3           | 19:45240861-45250906        | 0.14           | 1.31            | 2.68E-06        | 1.01E-04        |
| linc-FAM84B-9       | 8:128128655-128241550       | 0.64           | 0.06            | 2.69E-06        | 1.01E-04        |
| linc-ZNF599-3       | 19:35329964-35351417        | 19.90          | 5.19            | 4.26E-06        | 1.48E-04        |
| linc-PAXIP1-6       | 7:155056156-155059857       | 0.21           | 0.01            | 4.81E-06        | 1.64E-04        |
| linc-C5orf32-1      | 5:139541537-139553608       | 1.55           | 0.36            | 5.03E-06        | 1.70E-04        |
| linc-IL6-1          | 7:22602904-22641942         | 1.75           | 0.30            | 5.27E-06        | 1.77E-04        |
| linc-SYT4-1         | 18:42257060-42259599        | 2.09           | 0.28            | 5.90E-06        | 1.96E-04        |
| linc-CDH4-4         | 20:58895894-58900316        | 2.35           | 11.93           | 5.96E-06        | 1.97E-04        |
| linc-TMEM206-2      | 1:212800568-212811902       | 0.68           | 0.04            | 7.23E-06        | 2.31E-04        |
| linc-MTRNR2L6-3     | 7:141870969-141923474       | 0.42           | 2.83            | 7.44E-06        | 2.35E-04        |
| linc-MUC20-1        | 3:195435001-195438746       | 20.90          | 5.88            | 8.03E-06        | 2.49E-04        |
| linc-SATB2-2        | 2:200527509-200715899       | 0.92           | 0.03            | 9.45E-06        | 2.85E-04        |
| linc-GLI2-3         | 2:121334544-121362263       | 0.04           | 0.75            | 1.14E-05        | 3.29E-04        |
| linc-CLDN9          | 16:3039054-3044510          | 0.61           | 1.79            | 1.65E-05        | 4.42E-04        |
| linc-CA5A-2         | 16:88210868-88220609        | 0.44           | 0.03            | 1.72E-05        | 4.59E-04        |
| linc-TRMT112-1      | 11:64161813-64163303        | 3.06           | 0.39            | 2.18E-05        | 5.54E-04        |
| linc-ARIH2          | 3:48885369-48893739         | 1.67           | 0.24            | 2.35E-05        | 5.91E-04        |
| linc-MAPK8IP2       | 22:51021454-51038732        | 3.67           | 0.94            | 3.10E-05        | 7.39E-04        |
| linc-CERK-7         | 22:47857048-47882860        | 0.85           | 0.03            | 3.45E-05        | 8.03E-04        |
| linc-RBFOX2-1       | 22:36517579-36525898        | 4.35           | 0.62            | 3.46E-05        | 8.05E-04        |
| linc-VEZF1          | 17:56066402-56072211        | 20.09          | 8.10            | 3.66E-05        | 8.44E-04        |
| linc-RGPD8-2        | 2:113399406-113403306       | 12.23          | 3.69            | 4.14E-05        | 9.27E-04        |
| linc-GRIK3-2        | 1:37920479-37940044         | 2.24           | 0.25            | 4.27E-05        | 9.50E-04        |
| linc-ADI1           | 2:3579404-3584463           | 4.57           | 1.15            | 4.45E-05        | 9.83E-04        |
| linc-HIST1H2AG-4    | 6:26673487-26688063         | 2.29           | 0.68            | 5.05E-05        | 1.08E-03        |
| linc-CSTB-1         | 21:45576306-45580684        | 12.32          | 3.68            | 5.19E-05        | 1.11E-03        |
| linc-BOD1-2         | 5:173205285-173220885       | 0.00           | 0.64            | 5.34E-05        | 1.13E-03        |
| linc-DZIP1          | 13:96301011-96329209        | 0.20           | 1.15            | 5.63E-05        | 1.18E-03        |
| linc-ID2-3          | 2:7865832-7870836           | 50.41          | 6.41            | 1.01E-04        | 1.87E-03        |
| linc-HS3ST3A1-1     | 17:13679959-13685245        | 0.50           | 0.05            | 1.09E-04        | 1.99E-03        |
| linc-CD40LG         | X:135721701-135724588       | 3.71           | 1.14            | 1.25E-04        | 2.20E-03        |
| linc-PTP4A3-1       | 8:142384279-142392326       | 1.09           | 0.05            | 1.38E-04        | 2.36E-03        |
| linc-RREB1-3        | 6:6891669-6899654           | 0.01           | 0.51            | 1.66E-04        | 2.71E-03        |

|                      |                              |              |              |                 |                 |
|----------------------|------------------------------|--------------|--------------|-----------------|-----------------|
| linc-HMCN1-2         | 1:185339833-185344123        | 0.14         | 1.59         | 1.69E-04        | 2.74E-03        |
| linc-ANKRD33B-2      | 5:10479482-10482421          | 0.08         | 1.55         | 1.69E-04        | 2.74E-03        |
| linc-PELI1-5         | 2:64501018-64568781          | 1.16         | 6.48         | 1.86E-04        | 2.94E-03        |
| <b>linc-ARFIP1-4</b> | <b>4:153021905-153025789</b> | <b>41.99</b> | <b>13.43</b> | <b>2.02E-04</b> | <b>3.14E-03</b> |
| linc-KLF7-2          | 2:208041220-208124809        | 0.74         | 0.16         | 2.03E-04        | 3.15E-03        |
| linc-BMS1-4          | 10:38714746-38741081         | 0.64         | 0.14         | 2.15E-04        | 3.31E-03        |
| linc-STIL-2          | 1:47846386-47874257          | 0.56         | 0.03         | 2.22E-04        | 3.40E-03        |
| linc-RALGAPB         | 20:37075296-37079564         | 3.02         | 0.49         | 2.25E-04        | 3.43E-03        |
| linc-KLK3-2          | 19:51311910-51322134         | 0.66         | 0.11         | 2.32E-04        | 3.50E-03        |
| linc-MDM1-1          | 12:68825626-68845357         | 1.49         | 0.07         | 2.80E-04        | 4.06E-03        |
| linc-FAM82A1-3       | 2:37827039-37839573          | 4.66         | 1.43         | 2.84E-04        | 4.10E-03        |
| linc-RTEL1           | 20:62258579-62260177         | 64.38        | 17.41        | 2.84E-04        | 4.10E-03        |
| linc-C12orf74-1      | 12:92951147-92977935         | 1.02         | 0.15         | 3.31E-04        | 4.60E-03        |
| linc-TMEM194A        | 12:57477094-57481646         | 0.37         | 0.01         | 3.53E-04        | 4.80E-03        |
| linc-FBXO16-2        | 8:28536528-28558836          | 0.62         | 0.10         | 3.54E-04        | 4.81E-03        |
| linc-SEMG1           | 20:43808588-43821571         | 11.68        | 34.64        | 3.59E-04        | 4.86E-03        |
| linc-C1orf201-1      | 1:24822804-24882323          | 2.29         | 0.39         | 3.69E-04        | 4.97E-03        |
| linc-KATNAL1-3       | 13:30890496-30951282         | 8.78         | 4.59         | 3.84E-04        | 5.11E-03        |
| linc-CDK17-4         | 12:98879321-98897676         | 0.47         | 0.04         | 3.86E-04        | 5.13E-03        |
| linc-ZDHH11          | 5:858993-860350              | 1.12         | 0.17         | 4.00E-04        | 5.28E-03        |
| linc-RBL2            | 16:53412401-53423133         | 0.81         | 3.45         | 4.18E-04        | 5.44E-03        |
| linc-TMEM99-4        | 17:38673266-38683253         | 3.33         | 0.87         | 4.27E-04        | 5.53E-03        |
| linc-C14orf4-2       | 14:77507349-77552800         | 4.15         | 1.36         | 4.28E-04        | 5.54E-03        |
| linc-IL1R1           | 2:102661124-102674449        | 0.02         | 0.79         | 4.45E-04        | 5.67E-03        |
| linc-ATP6V1C2-4      | 2:10589125-10597755          | 1.05         | 0.23         | 4.79E-04        | 5.99E-03        |
| linc-CSMD1-1         | 8:6261076-6264069            | 1.38         | 0.45         | 5.66E-04        | 6.78E-03        |
| linc-NUDT4-4         | 12:93397337-93771512         | 0.35         | 0.02         | 5.66E-04        | 6.78E-03        |
| linc-STIM2-1         | 4:26846789-26860575          | 17.16        | 6.21         | 5.68E-04        | 6.79E-03        |
| linc-SLC39A10-10     | 2:192559714-192563971        | 3.18         | 13.70        | 5.71E-04        | 6.82E-03        |
| linc-SP110-2         | 2:231554953-231565244        | 0.00         | 0.48         | 5.83E-04        | 6.92E-03        |
| linc-CARD11-10       | 7:3133764-3157650            | 2.32         | 0.51         | 6.39E-04        | 7.45E-03        |
| linc-ZNF131-5        | 5:42950962-42960649          | 0.28         | 0.06         | 6.70E-04        | 7.73E-03        |
| linc-ACSL1-1         | 4:185748077-185776836        | 3.86         | 10.13        | 7.34E-04        | 8.31E-03        |
| linc-EFR3A-4         | 8:128806778-129113503        | 17.25        | 5.91         | 7.40E-04        | 8.34E-03        |
| linc-CST7-1          | 20:24911302-24912191         | 0.00         | 10.64        | 8.08E-04        | 8.85E-03        |
| linc-LPHN2-1         | 1:81001439-81112834          | 7.53         | 1.56         | 8.12E-04        | 8.88E-03        |
| linc-COL5A1-5        | 9:137371780-137375298        | 0.43         | 0.03         | 8.37E-04        | 9.02E-03        |
| linc-XIRP2-4         | 2:166651360-166666520        | 0.84         | 4.02         | 8.96E-04        | 9.54E-03        |
| linc-P2RY6           | 11:72964637-72970234         | 1.41         | 0.29         | 8.96E-04        | 9.54E-03        |
| linc-CES2-2          | 16:66926839-66930900         | 0.65         | 0.08         | 9.06E-04        | 9.61E-03        |
| linc-MIA3-1          | 1:222731243-222766374        | 0.44         | 0.05         | 9.36E-04        | 9.90E-03        |
| linc-NGFR-4          | 17:47308233-47316621         | 2.29         | 0.13         | 9.41E-04        | 9.94E-03        |
| linc-CSTB-9          | 21:45619131-45621216         | 0.19         | 0.01         | 9.47E-04        | 9.97E-03        |
| linc-SEC24B-2        | 4:109592410-109602985        | 0.11         | 0.01         | 9.85E-04        | 1.02E-02        |
| linc-NSUN2-3         | 5:6686437-6710411            | 0.58         | 0.09         | 1.04E-03        | 1.06E-02        |
| linc-ZNF681-4        | 19:28192407-28285209         | 4.08         | 1.98         | 1.06E-03        | 1.07E-02        |
| linc-CSPP1           | 8:67782983-67838589          | 0.03         | 0.54         | 1.11E-03        | 1.11E-02        |
| linc-CTBP1-4         | 4:1573435-1582249            | 44.46        | 16.73        | 1.20E-03        | 1.18E-02        |
| linc-MUC20-2         | 3:195367105-195377621        | 4.31         | 0.97         | 1.24E-03        | 1.21E-02        |
| linc-COL18A1-4       | 21:46707964-46730404         | 3.29         | 0.96         | 1.34E-03        | 1.28E-02        |
| linc-TRIP11          | 14:92511119-92516990         | 1.75         | 0.39         | 1.35E-03        | 1.28E-02        |
| linc-TMEM206-5       | 1:212603321-212606095        | 0.87         | 0.04         | 1.37E-03        | 1.30E-02        |
| linc-ITGB1           | 10:33362427-33405711         | 5.30         | 1.38         | 1.39E-03        | 1.31E-02        |

|                  |                        |       |       |          |          |
|------------------|------------------------|-------|-------|----------|----------|
| linc-WDTC1       | 1:27364504-27391197    | 0.01  | 0.13  | 1.42E-03 | 1.33E-02 |
| linc-IRF2BP2-3   | 1:235108773-235116505  | 0.35  | 4.53  | 1.51E-03 | 1.39E-02 |
| linc-FAM92B-3    | 16:85613415-85617197   | 1.58  | 0.20  | 1.64E-03 | 1.48E-02 |
| linc-POTED-8     | 21:9825743-9826389     | 10.03 | 2.61  | 1.90E-03 | 1.65E-02 |
| linc-IL4R-2      | 16:27236314-27301839   | 0.25  | 0.03  | 1.97E-03 | 1.69E-02 |
| linc-PFDN4-2     | 20:52556698-52559047   | 0.02  | 0.63  | 2.02E-03 | 1.72E-02 |
| linc-FOXQ1-2     | 6:693956-713766        | 2.00  | 0.15  | 2.02E-03 | 1.72E-02 |
| linc-IRF2BP2-1   | 1:235087870-235105809  | 3.27  | 8.81  | 2.03E-03 | 1.73E-02 |
| linc-MKLN1-1     | 7:130600638-130624493  | 0.56  | 0.13  | 2.06E-03 | 1.74E-02 |
| linc-ADAMTSL4    | 1:150504636-150509813  | 0.28  | 0.03  | 2.09E-03 | 1.76E-02 |
| linc-C13orf33-2  | 13:31377342-31384782   | 0.08  | 0.75  | 2.09E-03 | 1.76E-02 |
| linc-WDR53-1     | 3:196358368-196359460  | 1.71  | 0.13  | 2.12E-03 | 1.77E-02 |
| linc-RAB37       | 17:72601128-72603313   | 5.42  | 2.40  | 2.21E-03 | 1.82E-02 |
| linc-CDC42EP3    | 2:38053389-38103451    | 1.63  | 4.57  | 2.21E-03 | 1.82E-02 |
| linc-CGNL1-2     | 15:57592038-57600717   | 61.20 | 26.89 | 2.24E-03 | 1.84E-02 |
| linc-IL2RG       | X:70403408-70418025    | 4.36  | 1.10  | 2.30E-03 | 1.87E-02 |
| linc-GIMAP8-1    | 7:150130741-150145228  | 0.73  | 0.21  | 2.32E-03 | 1.88E-02 |
| linc-ZNF583-1    | 19:56904996-56915279   | 2.28  | 0.82  | 2.35E-03 | 1.90E-02 |
| linc-GPR123-2    | 10:134827222-134828171 | 18.09 | 49.01 | 2.37E-03 | 1.90E-02 |
| linc-TLL7-2      | 1:84542061-84543595    | 0.36  | 0.04  | 2.38E-03 | 1.91E-02 |
| linc-LDB2-3      | 4:17460263-17462011    | 0.96  | 0.12  | 2.46E-03 | 1.95E-02 |
| linc-HEATR2-2    | 7:560027-565027        | 3.12  | 7.08  | 2.49E-03 | 1.96E-02 |
| linc-RHOU        | 1:228688982-228697976  | 4.50  | 0.94  | 2.52E-03 | 1.98E-02 |
| linc-SPNS3       | 17:4062959-4063996     | 1.16  | 0.10  | 2.64E-03 | 2.05E-02 |
| linc-SERHL2-3    | 22:42665758-42673855   | 1.12  | 0.31  | 2.80E-03 | 2.14E-02 |
| linc-PTCD3-2     | 2:86116277-86144322    | 2.27  | 0.46  | 2.90E-03 | 2.19E-02 |
| linc-C10orf122-2 | 10:127371811-127408062 | 1.64  | 0.03  | 2.93E-03 | 2.20E-02 |
| linc-NUMB        | 14:73925555-73932873   | 26.66 | 50.38 | 2.94E-03 | 2.20E-02 |
| linc-FNDC1-3     | 6:159528337-159537085  | 0.52  | 0.05  | 2.98E-03 | 2.22E-02 |
| linc-MEIS2-4     | 15:38360990-38365188   | 0.29  | 0.04  | 2.98E-03 | 2.22E-02 |
| linc-RPL19-3     | 17:37081420-37085637   | 0.18  | 0.00  | 2.98E-03 | 2.22E-02 |
| linc-NRF1        | 7:129165372-129172230  | 0.42  | 0.03  | 3.04E-03 | 2.26E-02 |
| linc-HELT-4      | 4:185748077-185776836  | 0.03  | 0.22  | 3.13E-03 | 2.31E-02 |
| linc-MYOD1       | 11:17402305-17403209   | 1.61  | 0.33  | 3.13E-03 | 2.31E-02 |
| linc-TCERG1L-3   | 10:133730127-133733387 | 0.22  | 0.01  | 3.18E-03 | 2.34E-02 |
| linc-C14orf177-1 | 14:98602414-98628990   | 12.06 | 2.73  | 3.37E-03 | 2.43E-02 |
| linc-PRSS27      | 16:2787076-2821413     | 0.31  | 0.00  | 3.37E-03 | 2.43E-02 |
| linc-ITIH2-13    | 10:6319649-6377937     | 0.01  | 0.21  | 3.66E-03 | 2.57E-02 |
| linc-GLYATL2     | 11:58897609-58903816   | 1.95  | 0.71  | 3.79E-03 | 2.64E-02 |
| linc-C7orf45-2   | 7:129780902-129782455  | 0.88  | 0.00  | 3.94E-03 | 2.72E-02 |
| linc-TNFRSF14    | 1:2481358-2486841      | 10.03 | 3.84  | 4.01E-03 | 2.75E-02 |
| linc-ARMC2       | 6:109072856-109091145  | 0.03  | 0.26  | 4.03E-03 | 2.77E-02 |
| linc-ANO10-2     | 3:44462618-44465499    | 16.71 | 47.84 | 4.10E-03 | 2.80E-02 |
| linc-NBPF9-9     | 1:121138613-121204983  | 0.26  | 0.05  | 4.14E-03 | 2.82E-02 |
| linc-COPG-2      | 3:128949392-128955149  | 1.29  | 4.13  | 4.38E-03 | 2.94E-02 |
| linc-PARP10-2    | 8:145069126-145082072  | 0.18  | 0.01  | 4.61E-03 | 3.06E-02 |
| linc-C15orf42-2  | 15:89918592-89941720   | 1.80  | 0.74  | 4.63E-03 | 3.07E-02 |
| linc-GALNT2      | 1:230138431-230142912  | 0.49  | 0.00  | 4.66E-03 | 3.08E-02 |
| linc-WDR7-7      | 18:52495707-52565201   | 0.54  | 0.00  | 4.86E-03 | 3.18E-02 |
| linc-ASB7-3      | 15:100882801-100892899 | 0.41  | 0.08  | 4.88E-03 | 3.18E-02 |
| linc-RNASEH1-3   | 2:3616112-3622828      | 0.22  | 0.04  | 4.91E-03 | 3.20E-02 |
| linc-RIMKLB      | 12:8717333-8718789     | 0.00  | 0.37  | 4.95E-03 | 3.21E-02 |
| linc-TUBGCP3-2   | 13:113341523-113344135 | 3.67  | 1.56  | 4.97E-03 | 3.23E-02 |

|                 |                        |         |        |          |          |
|-----------------|------------------------|---------|--------|----------|----------|
| linc-LMF1       | 16:1041084-1043057     | 5.00    | 1.57   | 4.97E-03 | 3.23E-02 |
| linc-RPS7-1     | 2:3605975-3609462      | 0.80    | 0.11   | 5.03E-03 | 3.25E-02 |
| linc-NR2F1-7    | 5:90597873-90621000    | 0.04    | 0.99   | 5.08E-03 | 3.27E-02 |
| linc-CCND2      | 12:4320969-4322471     | 0.00    | 1.39   | 5.15E-03 | 3.29E-02 |
| linc-AMZ2-2     | 17:66179198-66185240   | 0.74    | 0.13   | 5.18E-03 | 3.30E-02 |
| linc-SBDS-4     | 7:66795256-66829655    | 0.16    | 0.03   | 5.26E-03 | 3.34E-02 |
| linc-C7orf23    | 7:86953597-86974837    | 20.00   | 7.84   | 5.29E-03 | 3.35E-02 |
| linc-TRIM39-1   | 6:30255173-30314635    | 10.67   | 3.32   | 5.34E-03 | 3.38E-02 |
| linc-INHBB      | 2:121060713-121085769  | 0.83    | 0.00   | 5.45E-03 | 3.42E-02 |
| linc-CADM1-3    | 11:115626035-115631345 | 0.18    | 0.03   | 5.45E-03 | 3.42E-02 |
| linc-SLC25A45-5 | 11:65265232-65278498   | 1090.00 | 487.10 | 5.59E-03 | 3.48E-02 |
| linc-PRKAA2-8   | 1:56289439-56333921    | 0.00    | 2.70   | 5.66E-03 | 3.50E-02 |
| linc-PRSS12-1   | 4:119584228-119596884  | 0.11    | 0.01   | 5.84E-03 | 3.57E-02 |
| linc-KLHL18-3   | 3:47205719-47388306    | 1.78    | 0.28   | 5.90E-03 | 3.60E-02 |
| linc-MAN2A2     | 15:91446089-91446964   | 0.36    | 2.87   | 5.91E-03 | 3.60E-02 |
| linc-SLC6A6     | 3:14266505-14272302    | 0.31    | 0.00   | 5.94E-03 | 3.61E-02 |
| linc-CCND1-4    | 11:69184376-69187267   | 0.20    | 0.03   | 5.98E-03 | 3.62E-02 |
| linc-VSIG10     | 12:118552480-118573755 | 0.59    | 0.17   | 6.36E-03 | 3.78E-02 |
| linc-RPL21-1    | 13:27746395-27760746   | 2.88    | 0.28   | 6.38E-03 | 3.79E-02 |
| linc-TSPAN10    | 17:79604196-79606203   | 0.01    | 0.11   | 6.42E-03 | 3.80E-02 |
| linc-GZMK       | 5:53939759-53942025    | 0.00    | 0.59   | 6.50E-03 | 3.84E-02 |
| linc-PITRM1-3   | 10:3507668-3545058     | 0.00    | 0.15   | 6.50E-03 | 3.84E-02 |
| linc-CTSD-3     | 11:2004438-2011150     | 3.99    | 1.73   | 6.77E-03 | 3.94E-02 |
| linc-CHD1L-1    | 1:146644349-146648626  | 0.36    | 0.04   | 7.17E-03 | 4.09E-02 |
| linc-GLI2-2     | 2:121334544-121362263  | 0.00    | 0.38   | 7.32E-03 | 4.14E-02 |
| linc-H1FNT      | 12:48606566-48639062   | 0.16    | 0.00   | 7.32E-03 | 4.14E-02 |
| linc-MED12L     | 3:150608646-150610167  | 1.57    | 7.13   | 7.36E-03 | 4.16E-02 |
| linc-ZNF30-3    | 19:35329964-35351417   | 6.46    | 2.67   | 7.41E-03 | 4.18E-02 |
| linc-C7orf27-3  | 7:2757466-2764726      | 0.32    | 0.08   | 7.54E-03 | 4.23E-02 |
| linc-SPR-2      | 2:71923939-72005321    | 0.00    | 0.22   | 7.65E-03 | 4.26E-02 |
| linc-FAM20C-2   | 7:149596-155427        | 3.24    | 1.48   | 7.84E-03 | 4.32E-02 |
| linc-COTL1-2    | 16:84981783-84984093   | 0.00    | 0.29   | 7.88E-03 | 4.34E-02 |
| linc-DTYMK-3    | 2:242671428-242673870  | 0.16    | 0.00   | 8.18E-03 | 4.44E-02 |
| linc-HEATR2-3   | 7:465455-468067        | 0.17    | 0.01   | 8.50E-03 | 4.55E-02 |
| linc-BBC3       | 19:47742377-47747476   | 0.00    | 0.92   | 8.51E-03 | 4.55E-02 |
| linc-FAR2-2     | 12:28723547-28734479   | 0.56    | 0.13   | 8.56E-03 | 4.57E-02 |
| linc-WNT8B      | 10:102133332-102154988 | 3.27    | 1.62   | 8.59E-03 | 4.58E-02 |
| linc-UBL5-4     | 19:9649408-9650405     | 0.35    | 0.02   | 8.86E-03 | 4.69E-02 |
| linc-MICA-2     | 6:31165536-31196425    | 111.00  | 197.25 | 9.07E-03 | 4.76E-02 |
| linc-AP3B1      | 5:77638188-77656217    | 4.05    | 1.36   | 9.32E-03 | 4.85E-02 |
| linc-GPR65-6    | 14:86378384-86596675   | 2.75    | 1.26   | 9.43E-03 | 4.88E-02 |
| linc-PPP1R1B    | 17:37706689-37723895   | 20.52   | 12.26  | 9.43E-03 | 4.88E-02 |
| linc-CA8-4      | 8:61822076-61823092    | 2.26    | 0.13   | 9.57E-03 | 4.92E-02 |
| linc-AKR1E2-6   | 10:3985204-4006403     | 0.40    | 0.00   | 9.60E-03 | 4.93E-02 |
| linc-ENPP4-1    | 6:45633187-45634483    | 0.05    | 0.45   | 9.74E-03 | 4.98E-02 |



**Supplementary Table III B: LPS-modulated lincRNAs in adipose of subject A deeply sequenced data. Highlighted are those that were selected for validation.**

| <b>lincRNA</b>        | <b>locus</b>                | <b>FPKM (pre-LPS)</b> | <b>FPKM (post-LPS)</b> | <b>p value</b>  | <b>q value</b>  |
|-----------------------|-----------------------------|-----------------------|------------------------|-----------------|-----------------|
| linc-ZFC3H1-3         | 12:72647286-73059422        | 25.33                 | 6.53                   | 2.21E-08        | 3.56E-06        |
| linc-TMEM30B          | 14:62022961-62121431        | 0.63                  | 0.00                   | 2.28E-08        | 3.56E-06        |
| <b>linc-TP53I13</b>   | <b>17:27894166-27895678</b> | <b>26.41</b>          | <b>6.14</b>            | <b>2.18E-07</b> | <b>1.98E-05</b> |
| <b>linc-DMRT2</b>     | <b>9:1045425-1049242</b>    | <b>9.36</b>           | <b>3.04</b>            | <b>3.31E-07</b> | <b>2.73E-05</b> |
| linc-LOC100129335-2   | 7:15728002-15736507         | 9.35                  | 1.95                   | 1.45E-06        | 8.09E-05        |
| linc-TMEM105-2        | 17:79361984-79367287        | 1.19                  | 0.19                   | 3.48E-06        | 1.48E-04        |
| linc-TSHZ3-6          | 19:32880955-32896445        | 0.19                  | 4.69                   | 4.05E-06        | 1.67E-04        |
| linc-PRELP            | 1:203343729-203369257       | 2.59                  | 0.88                   | 2.92E-05        | 6.71E-04        |
| linc-ARHGAP28-9       | 18:3466270-3478974          | 0.43                  | 4.83                   | 4.28E-05        | 8.87E-04        |
| linc-GHRH             | 20:36120873-36137759        | 2.56                  | 0.51                   | 5.88E-05        | 1.11E-03        |
| linc-DUSP26-5         | 8:37264138-37351420         | 0.05                  | 0.78                   | 6.79E-05        | 1.21E-03        |
| linc-TACC3            | 4:1546984-1555291           | 0.54                  | 0.13                   | 9.61E-05        | 1.56E-03        |
| linc-LY75             | 2:160780449-160792478       | 2.05                  | 0.61                   | 1.04E-04        | 1.67E-03        |
| linc-SGCG-4           | 13:23500256-23509087        | 1.18                  | 0.04                   | 1.30E-04        | 1.95E-03        |
| linc-PTGER4-4         | 5:39520510-39524809         | 4.10                  | 19.26                  | 1.58E-04        | 2.21E-03        |
| linc-UBQLN2           | X:56316469-56325981         | 0.68                  | 0.06                   | 1.84E-04        | 2.46E-03        |
| linc-FAM71F2-1        | 7:128273068-128281168       | 0.78                  | 0.13                   | 2.02E-04        | 2.60E-03        |
| linc-LEPROTL1-6       | 8:28915362-28922445         | 5.17                  | 1.83                   | 2.89E-04        | 3.35E-03        |
| linc-ARIH2            | 3:48885369-48893739         | 1.15                  | 0.18                   | 4.07E-04        | 4.28E-03        |
| <b>linc-POTED-8</b>   | <b>21:9825743-9826389</b>   | <b>2.95</b>           | <b>0.40</b>            | <b>5.31E-04</b> | <b>5.14E-03</b> |
| linc-NCAM1-2          | 11:112236379-112248544      | 0.73                  | 0.09                   | 5.32E-04        | 5.14E-03        |
| linc-NBPF15-1         | 1:148556022-148558168       | 3.14                  | 0.65                   | 6.12E-04        | 5.69E-03        |
| linc-HEATR2-2         | 7:560027-565027             | 0.31                  | 1.35                   | 7.10E-04        | 6.32E-03        |
| linc-STX2-4           | 12:132377834-132378419      | 0.07                  | 2.56                   | 1.02E-03        | 8.00E-03        |
| linc-CCND1-4          | 11:69184376-69187267        | 3.26                  | 0.94                   | 1.12E-03        | 8.47E-03        |
| linc-VWF              | 12:6258940-6289931          | 0.14                  | 1.75                   | 1.58E-03        | 1.08E-02        |
| linc-PENK-1           | 8:57406840-57472382         | 5.10                  | 2.81                   | 1.72E-03        | 1.15E-02        |
| linc-LGALS12          | 11:63261874-63268083        | 0.06                  | 0.70                   | 2.04E-03        | 1.29E-02        |
| linc-STIM2-1          | 4:26846789-26860575         | 4.85                  | 1.69                   | 2.14E-03        | 1.33E-02        |
| linc-CEP110-13        | 9:120521860-120639328       | 0.12                  | 1.71                   | 2.82E-03        | 1.60E-02        |
| linc-KIN-6            | 10:10825866-10837007        | 1.29                  | 3.89                   | 3.05E-03        | 1.68E-02        |
| linc-SNTG2-3          | 2:663813-667014             | 0.88                  | 0.28                   | 3.24E-03        | 1.74E-02        |
| linc-TPT1-2           | 13:45915479-45965618        | 0.91                  | 0.21                   | 3.55E-03        | 1.86E-02        |
| linc-GARS-3           | 7:30428961-30452157         | 1.80                  | 0.57                   | 4.47E-03        | 2.17E-02        |
| linc-HTR1D            | 1:23608314-23610576         | 0.94                  | 0.22                   | 4.50E-03        | 2.18E-02        |
| linc-TCF7L2-3         | 10:114578563-114590547      | 0.56                  | 0.19                   | 5.12E-03        | 2.38E-02        |
| linc-IARS2-3          | 1:219391857-219500273       | 0.69                  | 0.10                   | 5.56E-03        | 2.53E-02        |
| linc-CDK10            | 16:89748721-89752704        | 0.64                  | 0.00                   | 5.74E-03        | 2.59E-02        |
| linc-RHOXF1-1         | X:119251427-119253610       | 1.24                  | 0.15                   | 6.76E-03        | 2.89E-02        |
| linc-CGNL1-2          | 15:57592038-57600717        | 1.02                  | 0.42                   | 6.83E-03        | 2.91E-02        |
| linc-KLF6-2           | 10:4242828-4285981          | 0.13                  | 1.01                   | 7.11E-03        | 2.99E-02        |
| <b>linc-SLC16A7-3</b> | <b>12:58985430-59206436</b> | <b>21.52</b>          | <b>45.23</b>           | <b>7.75E-03</b> | <b>3.17E-02</b> |
| linc-TRPM1            | 15:31514041-31523050        | 0.85                  | 0.26                   | 7.89E-03        | 3.21E-02        |
| linc-PNRC1            | 6:89673582-89675075         | 0.09                  | 0.87                   | 8.31E-03        | 3.33E-02        |
| linc-CEP110-2         | 9:123555774-123561009       | 1.62                  | 0.28                   | 8.50E-03        | 3.38E-02        |
| linc-HNRNPA3-4        | 2:177494308-177520707       | 0.13                  | 1.38                   | 8.74E-03        | 3.45E-02        |
| linc-JAK1-4           | 1:65532309-65533420         | 1.35                  | 0.13                   | 8.75E-03        | 3.45E-02        |
| linc-TGFBR2-2         | 3:30392213-30433637         | 0.18                  | 1.04                   | 8.88E-03        | 3.49E-02        |
| linc-ANKRD20A1-4      | 9:67051144-67269646         | 0.69                  | 0.09                   | 9.12E-03        | 3.55E-02        |
| linc-CHMP2B-1         | 3:87138429-87206685         | 1.32                  | 0.27                   | 1.06E-02        | 3.95E-02        |

|                |                       |      |      |          |          |
|----------------|-----------------------|------|------|----------|----------|
| linc-FAM71F2-3 | 7:128166277-128170972 | 0.81 | 0.24 | 1.06E-02 | 3.96E-02 |
| linc-PDCD1-1   | 2:242835751-242844846 | 2.17 | 5.63 | 1.08E-02 | 4.01E-02 |
| linc-TTC15-5   | 2:1753645-1757701     | 1.47 | 0.51 | 1.18E-02 | 4.26E-02 |
| linc-ACSL1-1   | 4:185748077-185776836 | 1.44 | 3.72 | 1.20E-02 | 4.30E-02 |
| linc-TMEM17    | 2:62801490-62889929   | 1.62 | 0.42 | 1.32E-02 | 4.62E-02 |
| linc-HTR2A-3   | 13:48510590-48513514  | 0.00 | 0.87 | 1.36E-02 | 4.69E-02 |

**Supplementary Table III C: LPS-modulated lincRNAs in blood of subject A lowly sequenced data.**

| <b>lincRNA</b>  | <b>locus</b>           | <b>FPKM (pre-LPS)</b> | <b>FPKM (post-LPS)</b> | <b>p value</b> | <b>q value</b> |
|-----------------|------------------------|-----------------------|------------------------|----------------|----------------|
| linc-CSTB-3     | 21:45224584-45232448   | 7.86                  | 0.25                   | 2.22E-16       | 3.33E-13       |
| linc-TMEM105-2  | 17:79361984-79367287   | 2.24                  | 0.14                   | 2.14E-08       | 2.27E-06       |
| linc-TACC3      | 4:1546984-1555291      | 1.99                  | 0.20                   | 4.90E-07       | 3.19E-05       |
| linc-PPP2R2C-2  | 4:6689174-6692251      | 4.58                  | 0.39                   | 5.26E-07       | 3.35E-05       |
| linc-PTCD3-2    | 2:86116277-86144322    | 3.99                  | 0.15                   | 6.56E-07       | 4.00E-05       |
| linc-C2orf54-1  | 2:241894035-241906868  | 6.26                  | 0.09                   | 1.07E-06       | 6.05E-05       |
| linc-TP53I13    | 17:27894166-27895678   | 27.08                 | 7.02                   | 1.45E-06       | 7.72E-05       |
| linc-ZNF599-3   | 19:35329964-35351417   | 17.28                 | 3.29                   | 5.78E-06       | 2.29E-04       |
| linc-BRAP-2     | 12:112277506-112331228 | 13.15                 | 3.23                   | 8.31E-06       | 3.09E-04       |
| linc-TMEM206-2  | 1:212800568-212811902  | 2.07                  | 0.05                   | 1.36E-05       | 4.62E-04       |
| linc-CSTB-1     | 21:45576306-45580684   | 11.14                 | 2.87                   | 1.67E-05       | 5.50E-04       |
| linc-AP2B1-2    | 17:33640517-33652444   | 9.89                  | 2.28                   | 2.36E-05       | 7.12E-04       |
| linc-LFNG       | 7:2477397-2488305      | 4.86                  | 1.46                   | 2.79E-05       | 8.15E-04       |
| linc-C17orf87   | 17:5142427-5145921     | 4.37                  | 0.90                   | 3.11E-05       | 8.89E-04       |
| linc-LY6H       | 8:144362332-144363898  | 15.95                 | 3.60                   | 3.13E-05       | 8.94E-04       |
| linc-FAM20C-2   | 7:149596-155427        | 4.63                  | 0.77                   | 6.40E-05       | 1.55E-03       |
| linc-MAPK8IP2   | 22:51021454-51038732   | 7.19                  | 0.52                   | 1.10E-04       | 2.35E-03       |
| linc-DEC1       | 9:117418235-117425007  | 1.27                  | 0.12                   | 1.15E-04       | 2.43E-03       |
| linc-GRIK3-2    | 1:37920479-37940044    | 4.55                  | 0.41                   | 1.26E-04       | 2.59E-03       |
| linc-MUC20-1    | 3:195435001-195438746  | 17.27                 | 5.64                   | 1.39E-04       | 2.77E-03       |
| linc-CMC1-2     | 3:27753780-27755870    | 7.69                  | 1.66                   | 1.94E-04       | 3.63E-03       |
| linc-NUMB       | 14:73925555-73932873   | 23.95                 | 64.90                  | 2.05E-04       | 3.80E-03       |
| linc-TRMT112-1  | 11:64161813-64163303   | 3.24                  | 0.28                   | 2.19E-04       | 3.96E-03       |
| linc-EFR3A-4    | 8:128806778-129113503  | 16.79                 | 2.35                   | 2.27E-04       | 4.05E-03       |
| linc-PELI1-5    | 2:64501018-64568781    | 1.39                  | 9.20                   | 2.39E-04       | 4.17E-03       |
| linc-SYT4-1     | 18:42257060-42259599   | 2.23                  | 0.38                   | 2.76E-04       | 4.72E-03       |
| linc-MTRNR2L6-3 | 7:141870969-141923474  | 0.61                  | 3.04                   | 2.89E-04       | 4.90E-03       |
| linc-VEZF1      | 17:56066402-56072211   | 19.29                 | 7.21                   | 2.92E-04       | 4.92E-03       |
| linc-RBFOX2-1   | 22:36517579-36525898   | 4.14                  | 0.48                   | 2.93E-04       | 4.92E-03       |
| linc-ARFIP1-4   | 4:153021905-153025789  | 39.02                 | 11.59                  | 3.45E-04       | 5.51E-03       |
| linc-NSUN2-3    | 5:6686437-6710411      | 1.83                  | 0.02                   | 4.10E-04       | 6.10E-03       |
| linc-XIRP2-4    | 2:166651360-166666520  | 0.60                  | 4.79                   | 4.38E-04       | 6.38E-03       |
| linc-RALGAPB    | 20:37075296-37079564   | 3.66                  | 0.36                   | 4.99E-04       | 6.94E-03       |
| linc-CTSD-2     | 11:1792622-1793111     | 3.98                  | 23.54                  | 5.58E-04       | 7.43E-03       |
| linc-CARD11-10  | 7:3133764-3157650      | 2.81                  | 0.45                   | 6.95E-04       | 8.60E-03       |
| linc-IL2RG      | X:70403408-70418025    | 4.32                  | 0.58                   | 7.75E-04       | 9.27E-03       |
| linc-SEMG1      | 20:43808588-43821571   | 9.65                  | 29.71                  | 1.09E-03       | 1.17E-02       |
| linc-CDH4-4     | 20:58895894-58900316   | 2.54                  | 10.07                  | 1.08E-03       | 1.17E-02       |
| linc-GLYATL2    | 11:58897609-58903816   | 1.89                  | 0.51                   | 1.47E-03       | 1.48E-02       |
| linc-TMEM99-4   | 17:38673266-38683253   | 4.41                  | 1.03                   | 1.91E-03       | 1.79E-02       |
| linc-RTKL1      | 20:62258579-62260177   | 59.88                 | 19.09                  | 1.91E-03       | 1.79E-02       |
| linc-PRDM9-7    | 5:17444118-17485937    | 0.28                  | 6.81                   | 1.93E-03       | 1.79E-02       |
| linc-USP35      | 11:77850805-77854134   | 1.27                  | 0.04                   | 1.94E-03       | 1.80E-02       |
| linc-RBL2       | 16:53412401-53423133   | 0.89                  | 3.32                   | 1.97E-03       | 1.81E-02       |
| linc-POTED-8    | 21:9825743-9826389     | 13.57                 | 3.12                   | 2.23E-03       | 1.97E-02       |
| linc-TRIM39-1   | 6:30255173-30314635    | 13.29                 | 3.37                   | 2.30E-03       | 2.00E-02       |
| linc-FAM82A1-3  | 2:37827039-37839573    | 3.39                  | 0.75                   | 2.67E-03       | 2.23E-02       |
| linc-SLC25A45-5 | 11:65265232-65278498   | 1069.60               | 456.90                 | 2.75E-03       | 2.27E-02       |
| linc-RAB37      | 17:72601128-72603313   | 6.34                  | 2.67                   | 2.81E-03       | 2.30E-02       |

|                  |                        |       |       |          |          |
|------------------|------------------------|-------|-------|----------|----------|
| linc-FAM153A-2   | 5:177387461-177392855  | 4.11  | 0.42  | 2.81E-03 | 2.31E-02 |
| linc-CGNL1-2     | 15:57592038-57600717   | 56.65 | 25.00 | 3.06E-03 | 2.44E-02 |
| linc-C10orf122-2 | 10:127371811-127408062 | 2.74  | 0.00  | 3.31E-03 | 2.57E-02 |
| linc-FAM92B-3    | 16:85613415-85617197   | 2.95  | 0.00  | 3.56E-03 | 2.67E-02 |
| linc-SATB2-2     | 2:200527509-200715899  | 1.41  | 0.00  | 3.62E-03 | 2.70E-02 |
| linc-P2RY6       | 11:72964637-72970234   | 1.38  | 0.24  | 3.88E-03 | 2.83E-02 |
| linc-ITGB1       | 10:33362427-33405711   | 6.22  | 1.69  | 3.93E-03 | 2.84E-02 |
| linc-CST7-1      | 20:24911302-24912191   | 0.00  | 11.40 | 3.98E-03 | 2.87E-02 |
| linc-STIL-2      | 1:47846386-47874257    | 1.10  | 0.00  | 4.76E-03 | 3.22E-02 |
| linc-IL1R1       | 2:102661124-102674449  | 0.00  | 1.55  | 4.76E-03 | 3.22E-02 |
| linc-PPP1R1B     | 17:37706689-37723895   | 20.99 | 10.62 | 4.97E-03 | 3.31E-02 |
| linc-SLC39A10-10 | 2:192559714-192563971  | 4.02  | 13.51 | 5.06E-03 | 3.35E-02 |
| linc-GALNTL5-3   | 7:151078206-151110811  | 1.33  | 0.12  | 5.25E-03 | 3.43E-02 |
| linc-C14orf4-2   | 14:77507349-77552800   | 3.52  | 0.88  | 5.39E-03 | 3.50E-02 |
| linc-PKMYT1      | 16:3056585-3057374     | 0.49  | 4.28  | 6.04E-03 | 3.76E-02 |
| linc-ANKRD27     | 19:33177953-33182862   | 1.26  | 0.00  | 6.28E-03 | 3.85E-02 |
| linc-CERK-7      | 22:47857048-47882860   | 0.97  | 0.00  | 6.28E-03 | 3.85E-02 |
| linc-BCL11B      | 14:99750983-99763570   | 5.51  | 0.78  | 6.32E-03 | 3.85E-02 |
| linc-HAAO-3      | 2:43028633-43038968    | 5.11  | 0.33  | 7.47E-03 | 4.26E-02 |
| linc-IER5L-2     | 9:132250938-132275965  | 2.64  | 0.83  | 7.60E-03 | 4.30E-02 |
| linc-SERHL2-3    | 22:42665758-42673855   | 1.17  | 0.32  | 8.13E-03 | 4.48E-02 |
| linc-NUSAP1      | 15:41576200-41598741   | 25.71 | 6.10  | 8.52E-03 | 4.59E-02 |
| linc-PHF21B      | 22:45529452-45559662   | 2.20  | 0.41  | 8.63E-03 | 4.63E-02 |
| linc-SPIN4       | X:62617329-62780970    | 59.58 | 21.86 | 8.78E-03 | 4.68E-02 |
| linc-KCMF1       | 2:85190234-85194331    | 4.43  | 1.21  | 8.81E-03 | 4.69E-02 |

**Supplementary Table III D: LPS-modulated lincRNAs in adipose of subject A lowly sequenced data.**

| <b>lincRNA</b>      | <b>locus</b>           | <b>FPKM (pre-LPS)</b> | <b>FPKM (post-LPS)</b> | <b>p value</b> | <b>q value</b> |
|---------------------|------------------------|-----------------------|------------------------|----------------|----------------|
| linc-DMRT2          | 9:1045425-1049242      | 11.22                 | 3.53                   | 3.47E-06       | 1.60E-04       |
| linc-TP53I13        | 17:27894166-27895678   | 62.74                 | 17.37                  | 8.68E-06       | 3.45E-04       |
| linc-ZKSCAN1-1      | 7:99594666-99609249    | 0.50                  | 9.20                   | 2.23E-05       | 7.98E-04       |
| linc-LOC100129335-2 | 7:15728002-15736507    | 9.14                  | 1.65                   | 3.65E-05       | 1.16E-03       |
| linc-ANKRD5-1       | 20:9966735-9987764     | 7.54                  | 28.52                  | 3.91E-05       | 1.21E-03       |
| linc-POTED-8        | 21:9825743-9826389     | 8.70                  | 1.24                   | 2.70E-04       | 5.44E-03       |
| linc-PTGER4-4       | 5:39520510-39524809    | 5.72                  | 23.95                  | 9.28E-04       | 1.38E-02       |
| linc-TMED5          | 1:93770667-93811405    | 7.50                  | 2.21                   | 9.69E-04       | 1.43E-02       |
| linc-TRIM29-3       | 11:121899034-121938108 | 1.89                  | 8.01                   | 1.62E-03       | 2.04E-02       |

**Supplementary Table IV. Numbers of expressed and LPS-modulated lincRNAs in Subject A whole blood and peripheral blood mononuclear cell (PBMC) RNA-Seq data.**

|                 | Blood* | PBMC* | Overlap | #Percent Overlap     |
|-----------------|--------|-------|---------|----------------------|
| Pre-LPS         | 931    | 664   | 540     | 81% of PBMC in blood |
| Post-LPS        | 894    | 664   | 548     | 82% of PBMC in blood |
| LPS-modulated   | 201    | 122   | 58      | 48% of PBMC in blood |
| % LPS-modulated | 21.6%  | 18.4% |         |                      |

\*RNA-seq depth was substantially deeper in subject A whole blood (“500M” data, see Suppl Table 2A) than in subject A PBMCs (“100M” data, Supple Table 2A). Thus, as expected, the number of lincRNAs detected and in particular LPS-modulated lincRNAs (see Suppl Figure 1) in PBMCs is lower than in whole blood. However, the percent of lincRNAs that were LPS-modulated in PBMCs (18.4%) was very similar to that LPS-modulated in whole blood (21.6%). #Of lincRNAs detected and LPS-modulated in PBMCs, there was substantial overlap with those detected and LPS-modulated in whole blood.

**Supplementary Table V: Inflammatory and cardiometabolic traits in NHGRI GWAS catalogue**

| Index | Trait                                                             |
|-------|-------------------------------------------------------------------|
| 1     | Abdominal aortic aneurysm                                         |
| 2     | Activated partial thromboplastin time                             |
| 3     | Adiponectin levels                                                |
| 4     | Adiposity                                                         |
| 5     | Adiposity in newborns                                             |
| 6     | Aging                                                             |
| 7     | Aging (time to death)                                             |
| 8     | Aging (time to event)                                             |
| 9     | Aging traits                                                      |
| 10    | Ankle-brachial index                                              |
| 11    | Anticoagulant levels                                              |
| 12    | Aortic root size                                                  |
| 13    | Aortic stiffness                                                  |
| 14    | Aortic-valve calcification                                        |
| 15    | Apolipoprotein Levels                                             |
| 16    | Arterial stiffness                                                |
| 17    | Blood pressure                                                    |
| 18    | Body mass (lean)                                                  |
| 19    | Body mass index                                                   |
| 20    | Body mass index (interaction)                                     |
| 21    | Body mass index and cholesterol (psychopharmacological treatment) |
| 22    | Body mass index and fat mass                                      |
| 23    | Cardiac hypertrophy                                               |
| 24    | Cardiac structure and function                                    |
| 25    | Cardiac Troponin-T levels                                         |
| 26    | Cardiovascular disease risk factors                               |
| 27    | Carotid atherosclerosis in HIV infection                          |
| 28    | Carotid intima media thickness                                    |
| 29    | Cholesterol                                                       |
| 30    | Cholesterol and Triglycerides                                     |
| 31    | Cholesterol, total                                                |
| 32    | Circulating vasoactive peptide levels                             |
| 33    | Coagulation factor levels                                         |
| 34    | Coronary arterial lesions in patients with Kawasaki disease       |
| 35    | Coronary artery calcification                                     |
| 36    | Coronary heart disease                                            |
| 37    | Coronary restenosis                                               |
| 38    | Coronary spasm                                                    |
| 39    | C-reactive protein                                                |
| 40    | C-reactive protein and white blood cell count                     |
| 41    | Diabetes (gestational)                                            |
| 42    | Diabetes (incident)                                               |
| 43    | Diabetes related insulin traits                                   |
| 44    | Diastolic blood pressure                                          |
| 45    | Dietary macronutrient intake                                      |
| 46    | Echocardiographic traits                                          |
| 47    | Endothelial function traits                                       |
| 48    | End-stage coagulation                                             |
| 49    | Eosinophil counts                                                 |

|     |                                                                                       |
|-----|---------------------------------------------------------------------------------------|
| 50  | Erythrocyte sedimentation rate                                                        |
| 51  | E-selectin levels                                                                     |
| 52  | Exercise treadmill test traits                                                        |
| 53  | Factor VII                                                                            |
| 54  | Factor XI                                                                             |
| 55  | Fasting glucose-related traits                                                        |
| 56  | Fasting glucose-related traits (interaction with BMI)                                 |
| 57  | Fasting insulin-related traits                                                        |
| 58  | Fasting insulin-related traits (interaction with BMI)                                 |
| 59  | Fasting plasma glucose                                                                |
| 60  | Fat distribution (HIV)                                                                |
| 61  | Fat intake                                                                            |
| 62  | Fibrinogen                                                                            |
| 63  | Formal thought disorder in schizophrenia                                              |
| 64  | Glycated hemoglobin levels                                                            |
| 65  | Glycemic control in type 1 diabetes (HbA1c)                                           |
| 66  | Glycemic traits                                                                       |
| 67  | Haptoglobin levels                                                                    |
| 68  | HbA2 levels                                                                           |
| 69  | HDL cholesterol                                                                       |
| 70  | HDL Cholesterol - Triglycerides (HDL-C-TG)                                            |
| 71  | Heart rate                                                                            |
| 72  | Hematological parameters                                                              |
| 73  | Hematology traits                                                                     |
| 74  | Hemostatic factors and hematological phenotypes                                       |
| 75  | Homocysteine levels                                                                   |
| 76  | Hypertension                                                                          |
| 77  | Hypertension risk in short sleep duration                                             |
| 78  | Hypertriglyceridemia                                                                  |
| 79  | Hypertrophic cardiomyopathy                                                           |
| 80  | IgG glycosylation                                                                     |
| 81  | IgM levels                                                                            |
| 82  | Inflammatory biomarkers                                                               |
| 83  | Insulin resistance/response                                                           |
| 84  | Insulin-like growth factors                                                           |
| 85  | Insulin-related traits                                                                |
| 86  | Interleukin-18 levels                                                                 |
| 87  | Intracranial aneurysm                                                                 |
| 88  | Kawasaki disease                                                                      |
| 89  | LDL (oxidized)                                                                        |
| 90  | LDL cholesterol                                                                       |
| 91  | Lean body mass and age at menarche (combined)                                         |
| 92  | Left ventricular mass                                                                 |
| 93  | Lipid levels in hepatitis C treatment                                                 |
| 94  | Lipid metabolism phenotypes                                                           |
| 95  | Lipid traits                                                                          |
| 96  | Lipoprotein diameter                                                                  |
| 97  | Lipoprotein-associated phospholipase A2 activity and mass                             |
| 98  | Lipoprotein-associated phospholipase A2 activity change in response to statin therapy |
| 99  | Longevity                                                                             |
| 100 | Lp (a) levels                                                                         |
| 101 | Matrix metalloproteinase levels                                                       |



|     |                                                                                              |
|-----|----------------------------------------------------------------------------------------------|
| 102 | Mean platelet volume                                                                         |
| 103 | Metabolic syndrome                                                                           |
| 104 | Metabolic syndrome (bivariate traits)                                                        |
| 105 | Metabolic traits                                                                             |
| 106 | Metabolite levels                                                                            |
| 107 | Mitral annular calcification                                                                 |
| 108 | Monocyte chemoattractant protein-1                                                           |
| 109 | Monocyte count                                                                               |
| 110 | Morbidity-free survival                                                                      |
| 111 | Moyamoya disease                                                                             |
| 112 | Myocardial infarction                                                                        |
| 113 | Myocardial infarction (early onset)                                                          |
| 114 | Natriuretic peptide levels                                                                   |
| 115 | Neutrophil count                                                                             |
| 116 | Nicotine dependence                                                                          |
| 117 | Nonalcoholic fatty liver disease                                                             |
| 118 | Non-alcoholic fatty liver disease                                                            |
| 119 | Non-alcoholic fatty liver disease histology (AST)                                            |
| 120 | Non-alcoholic fatty liver disease histology (lobular)                                        |
| 121 | Non-alcoholic fatty liver disease histology (other)                                          |
| 122 | Obesity                                                                                      |
| 123 | Obesity (early onset extreme)                                                                |
| 124 | Obesity (extreme)                                                                            |
| 125 | Obesity and blood pressure                                                                   |
| 126 | Obesity and osteoporosis                                                                     |
| 127 | Obesity-related traits                                                                       |
| 128 | Oleic acid (18:1n-9) plasma levels                                                           |
| 129 | Palmitic acid (16:0) plasma levels                                                           |
| 130 | Palmitoleic acid (16:1n-7) plasma levels                                                     |
| 131 | Paraoxonase activity                                                                         |
| 132 | Pericardial fat                                                                              |
| 133 | Peripheral artery disease                                                                    |
| 134 | Phospholipid levels (plasma)                                                                 |
| 135 | Phytosterol levels                                                                           |
| 136 | Plasminogen activator inhibitor type 1 levels (PAI-1)                                        |
| 137 | Platelet aggregation                                                                         |
| 138 | Platelet counts                                                                              |
| 139 | Platelet function and related traits                                                         |
| 140 | Platelet reactivity                                                                          |
| 141 | Polycystic ovary syndrome                                                                    |
| 142 | Polyunsaturated fatty acid levels                                                            |
| 143 | Preeclampsia                                                                                 |
| 144 | Presence of antiphospholipid antibodies                                                      |
| 145 | Proinsulin levels                                                                            |
| 146 | Protein C levels                                                                             |
| 147 | Prothrombin time                                                                             |
| 148 | Pulmonary arterial hypertension (without BMPR2 mutations)                                    |
| 149 | QT interval (interaction)                                                                    |
| 150 | Resistin levels                                                                              |
| 151 | Response to angiotensin II receptor blocker therapy                                          |
| 152 | Response to angiotensin II receptor blocker therapy (opposite direction w/ diuretic therapy) |
| 153 | Response to antiplatelet therapy                                                             |

|     |                                                                     |
|-----|---------------------------------------------------------------------|
| 154 | Response to cerivastatin                                            |
| 155 | Response to clopidogrel therapy                                     |
| 156 | Response to fenofibrate                                             |
| 157 | Response to fenofibrate (adiponectin levels)                        |
| 158 | Response to statin therapy                                          |
| 159 | Response to statin therapy (LDL-C)                                  |
| 160 | Select biomarker traits                                             |
| 161 | Smoking behavior                                                    |
| 162 | Smoking cessation                                                   |
| 163 | Soluble E-selectin levels                                           |
| 164 | Soluble ICAM-1                                                      |
| 165 | Soluble levels of adhesion molecules                                |
| 166 | Sphingolipid levels                                                 |
| 167 | Stearic acid (18:0) plasma levels                                   |
| 168 | Stroke                                                              |
| 169 | Stroke (ischemic)                                                   |
| 170 | Subclinical atherosclerosis traits (other)                          |
| 171 | Subclinical brain infarct                                           |
| 172 | Subcutaneous adipose tissue                                         |
| 173 | Systolic blood pressure                                             |
| 174 | Telomere length                                                     |
| 175 | Thiazide-induced adverse metabolic effects in hypertensive patients |
| 176 | Thoracic aortic aneurysms and dissections                           |
| 177 | Tonometry                                                           |
| 178 | Triglycerides                                                       |
| 179 | Triglycerides-Blood Pressure (TG-BP)                                |
| 180 | Two-hour glucose challenge                                          |
| 181 | Type 2 diabetes                                                     |
| 182 | Type 2 diabetes (dietary heme iron intake interaction)              |
| 183 | Type 2 diabetes and 6 quantitative traits                           |
| 184 | Type 2 diabetes and gout                                            |
| 185 | Type 2 diabetes and other traits                                    |
| 186 | Type 2 diabetes nephropathy                                         |
| 187 | Urinary albumin excretion                                           |
| 188 | Vascular constriction                                               |
| 189 | Vascular dementia                                                   |
| 190 | Vascular endothelial growth factor levels                           |
| 191 | Venous thromboembolism                                              |
| 192 | Venous thromboembolism (gene x gene interaction)                    |
| 193 | Visceral adipose tissue adjusted for BMI                            |
| 194 | Visceral adipose tissue/subcutaneous adipose tissue ratio           |
| 195 | Visceral fat                                                        |
| 196 | vWF and FVIII levels                                                |
| 197 | Waist circumference                                                 |
| 198 | Waist Circumference - Triglycerides (WC-TG)                         |
| 199 | Waist circumference and related phenotypes                          |
| 200 | Waist-hip ratio                                                     |
| 201 | Waist-to-hip circumference ratio (interaction)                      |
| 202 | Weight                                                              |
| 203 | White blood cell count                                              |
| 204 | White blood cell types                                              |
| 205 | YKL-40 levels                                                       |

**Supplementary Table VI.** Primers and probes were designed using the Life Technologies Custom TaqMan Assay Design Tool.

| <b>lincRNA</b> | <b>TaqMan Custom Gene Expression Assay ID</b> |
|----------------|-----------------------------------------------|
| linc-ARFIP1-4  | AIHSOSJ                                       |
| linc-CMC1-2    | AIWR2U5                                       |
| linc-DMRT2     | AIFASF3                                       |
| linc-POTED-8   | AIT957B                                       |
| linc-SLC16A7-3 | AIMSHHF                                       |
| linc-TP53I13   | AIVI4DJ                                       |

**Supplementary Figure I. Percentages of detected expressed lincRNAs and LPS-modulated lincRNAs for datasets with various sequencing depths.** PreLPS: detection rate for expressed lincRNAs in the pre-LPS sample; post-PLS: detection rate for expressed lincRNAs in the post-LPS sample; LPS.modulated: detection rate for LPS-modulated lincRNAs.

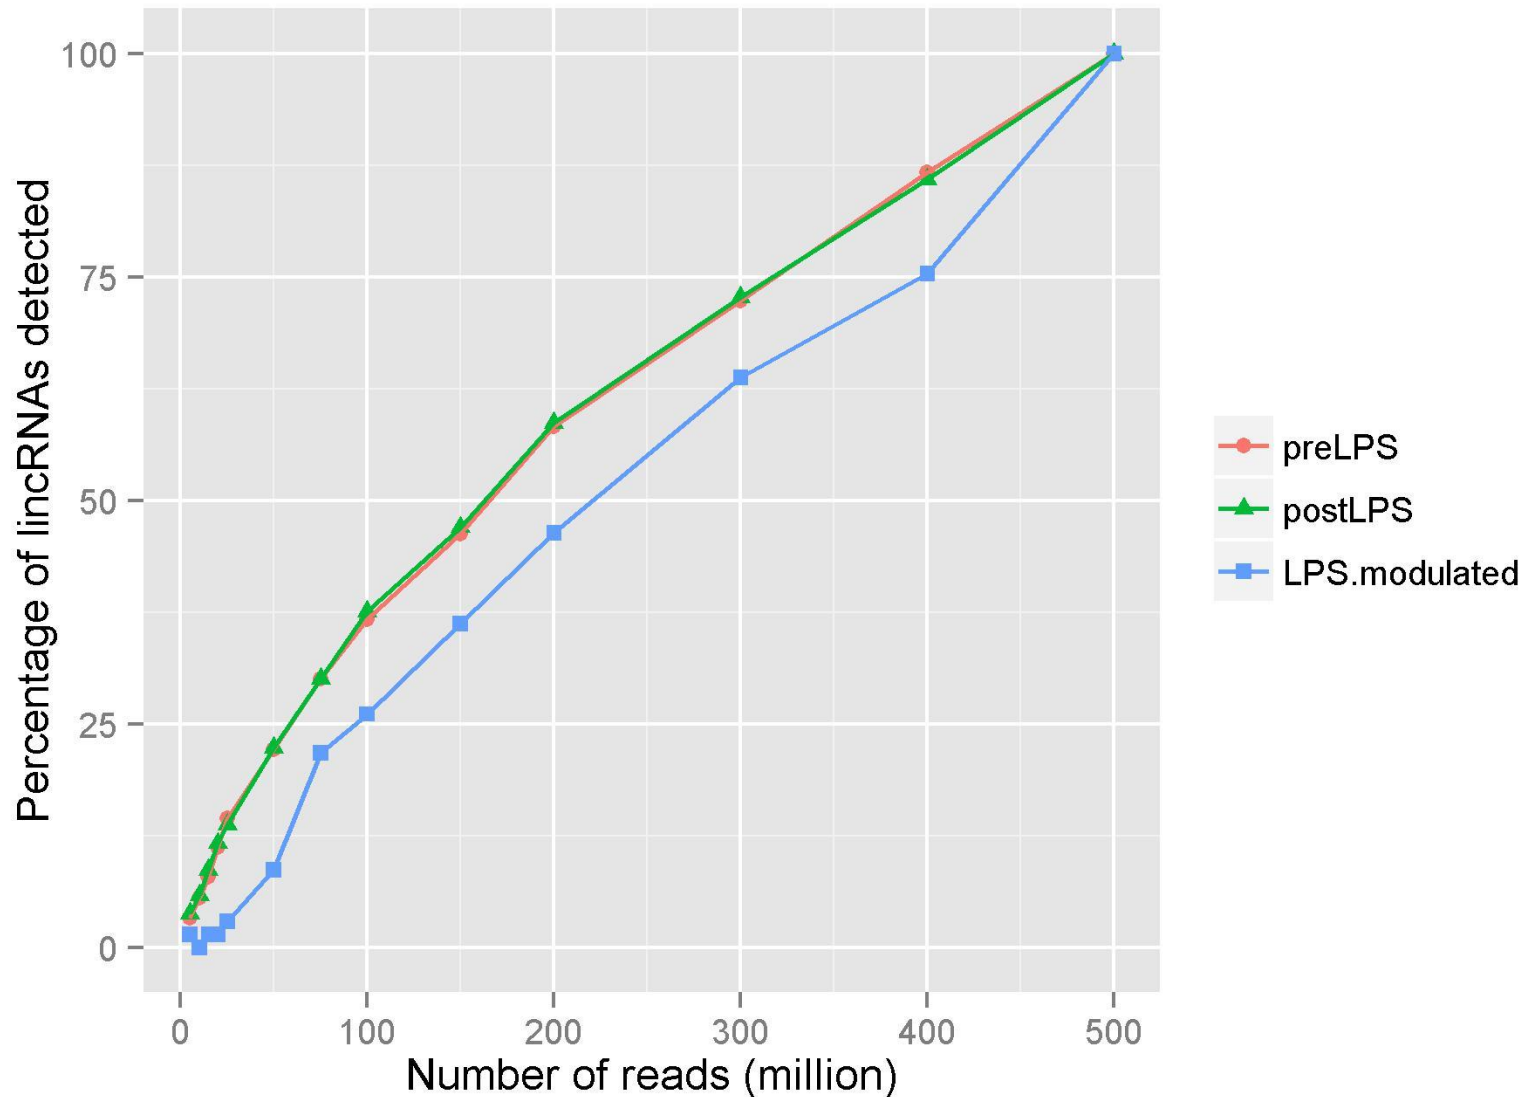

**Supplementary Figure II. Validation and replication for additional LPS modulated lincRNAs.** Data for (A) blood lincRNAs, linc-TP53I13 as well as (B) adipose lincRNAs, linc-TP53I13 and linc-SLC16A7 are shown. (i) Genome browser views of RNA-seq data before and after LPS in subject A. (ii) Quantitative real-time PCR (qRT-PCR) validation of lincRNA in tissue of subject A and (iii) qRT-PCR replication of lincRNA in tissues of subject B-G (subject G blood sample failed). For (ii) and (iii) expression data are presented as bar-graphs of relative fold-change compared with pre-LPS. The delta CT's represent the median cycle threshold for lincRNAs relative to B-actin mRNA as the reference in each sample.

## A. Blood

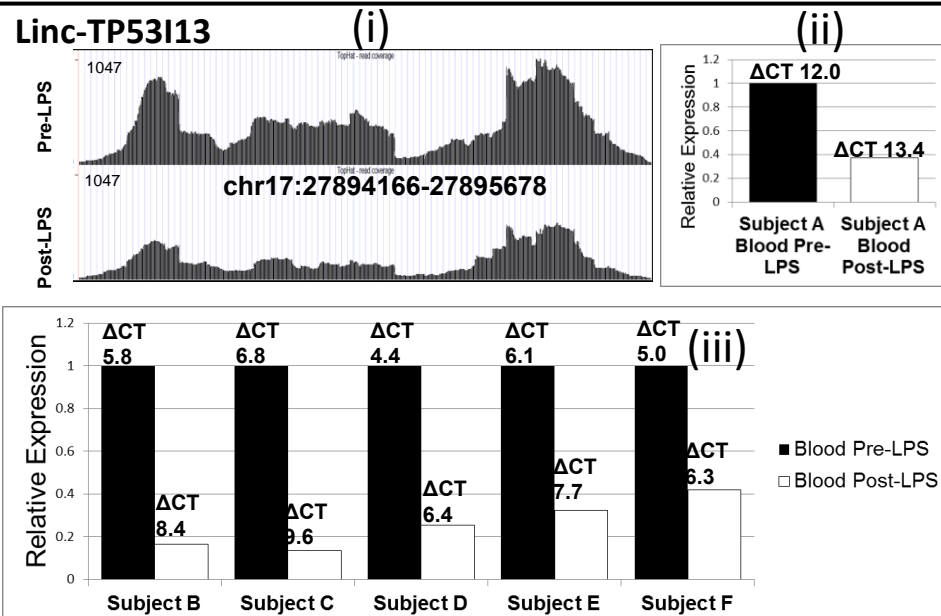

## B. Adipose

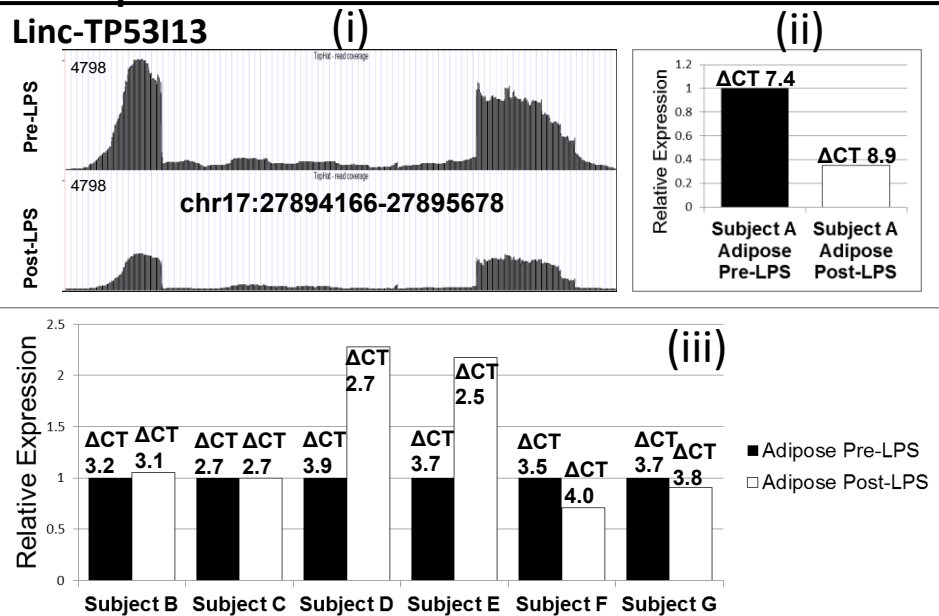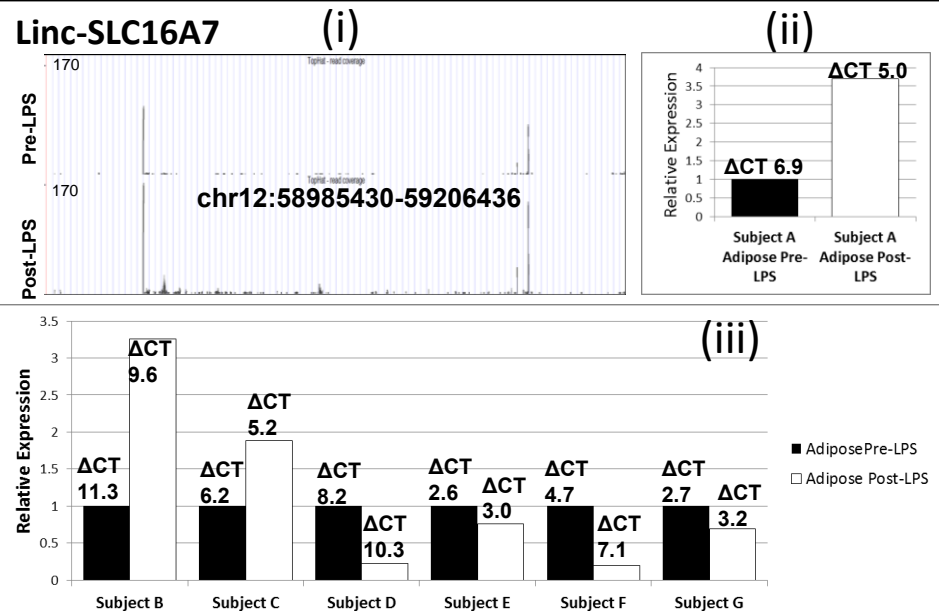

**Supplementary Figure III. Conservation of lincRNAs compared to protein coding genes and intergenic non-lincRNA, non-protein coding sequences.** Using primate phastCons scores from 46-way vertebrate genome alignment<sup>10</sup> (available in conservation track from UCSC genome browser <http://genome.ucsc.edu/>), expressed lincRNAs were markedly less conserved than protein-coding genes while, in adipose but not blood, lincRNAs were slightly more conserved than intergenic regions.

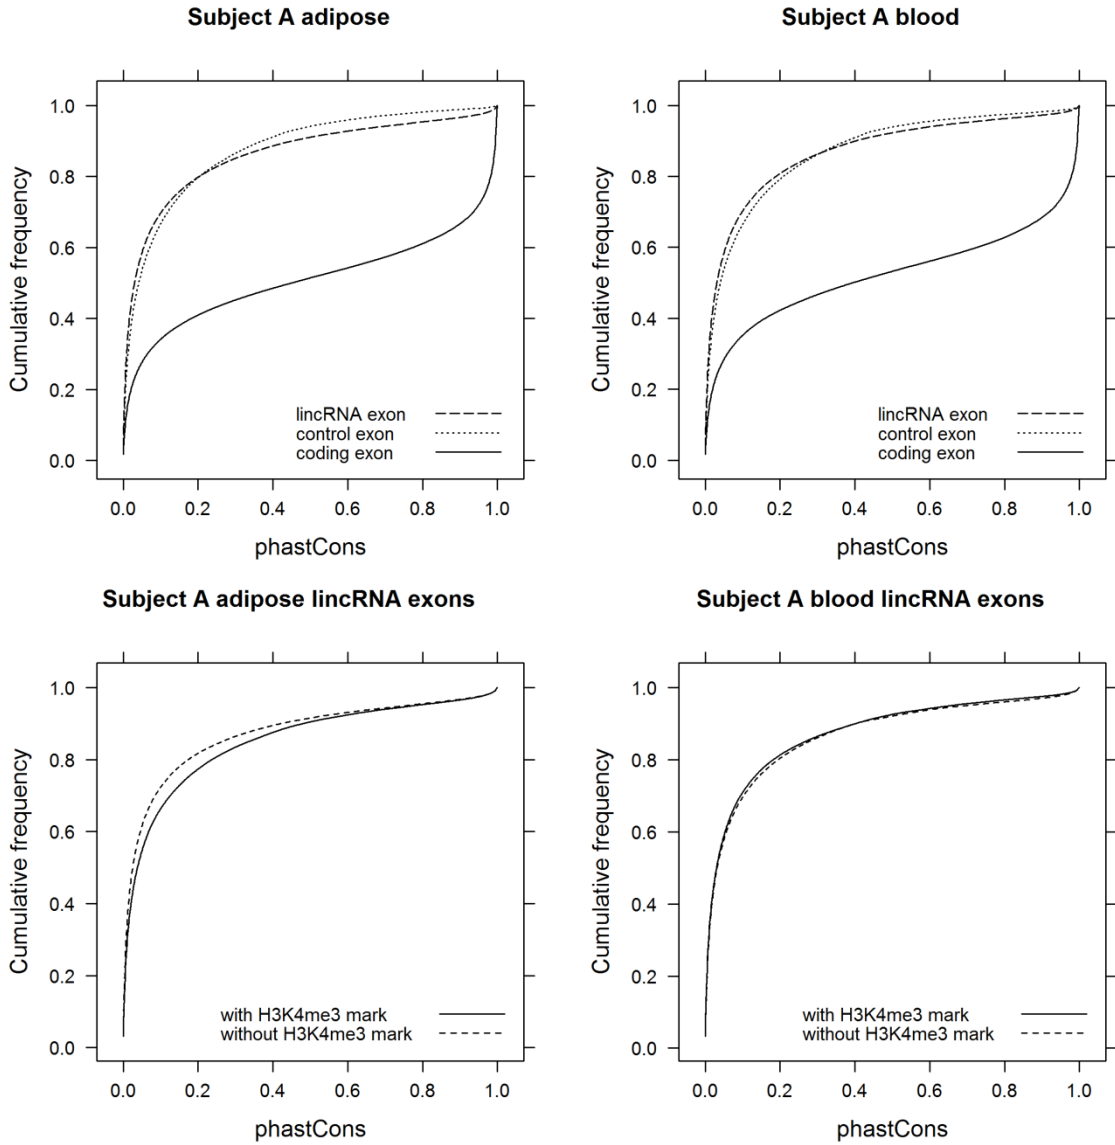

Supplement: NIHMS561211-supplement-Supplementary_Tables_and_Figures.pdf [file NIHMS561211-supplement-Supplementary_Tables_and_Figures.pdf]
